# Supplementary material for: Phosphorelays Provide Tunable Signal Processing Capabilities for the Cell
Source: PubMed Central journal article supplement (PMC3820541; doi:10.1371/journal.pcbi.1003322), 2013-11-07

A

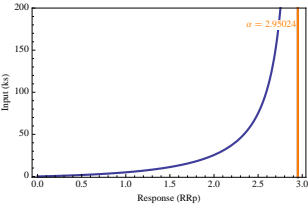

B

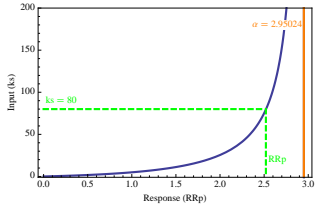

C

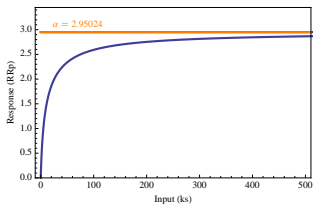

Supplement: pcbi.1003322.s004.pdf [file pcbi.1003322.s004.pdf]
