# Supplementary material for: Phosphorelays Provide Tunable Signal Processing Capabilities for the Cell
Source: PLoS Comput Biol. 2013 Nov 7;9(11):e1003322. doi: 10.1371/journal.pcbi.1003322 (PMC3820541; doi:10.1371/journal.pcbi.1003322)
Supplement: Text S1 — List of all possible topologies in a four-layered phosphorelay. The topologies are indicated with a binary identification code that indicates the presence (1) or absence (0) of reverse phosphotransfer reactions along the layer, and the presence (1) or absence (0) of hydrolysis reactions at layers 2 and 4. (XLS) [file pcbi.1003322.s005.xls]

## Sheet: Sheet1 - Table 1
To ensure that there are four layers in the relay, we set all the forward reactions to be present
The other reactions present (absent) in a given topology are indicated with a 1 (0).
Non responsive topologies (under the assumption of monofuncitonal HK) are highlighted with green backdrop
TOPOLOGY ID	REVERSE REACTIONS			AUTO-HYDROLYSIS
	Recp+HKHKp+Rec	Hptp+RecRecp+Hpt	RRp+HptHptp+RR	RecpRec + Pi	RRpRR + Pi
TOPOLOGY 1	1	0	0	0	1
TOPOLOGY 2	0	1	0	0	1
TOPOLOGY 3	0	0	1	0	1
TOPOLOGY 4	1	0	1	0	1
TOPOLOGY 5	1	1	0	0	1
TOPOLOGY 6	0	1	1	0	1
TOPOLOGY 7	0	0	0	0	1
TOPOLOGY 8	1	1	1	0	1
TOPOLOGY 9	1	0	0	1	0
TOPOLOGY 10	0	1	0	1	0
TOPOLOGY 11	0	0	1	1	0
TOPOLOGY 12	1	0	1	1	0
TOPOLOGY 13	1	1	0	1	0
TOPOLOGY 14	0	1	1	1	0
TOPOLOGY 15	0	0	0	1	0
TOPOLOGY 16	1	1	1	1	0
TOPOLOGY 17	1	0	0	0	0
TOPOLOGY 18	0	1	0	0	0
TOPOLOGY 19	0	0	1	0	0
TOPOLOGY 20	1	0	1	0	0
TOPOLOGY 21	1	1	0	0	0
TOPOLOGY 22	0	1	1	0	0
TOPOLOGY 23	0	0	0	0	0
TOPOLOGY 24	1	1	1	0	0
TOPOLOGY 25	1	0	0	1	1
TOPOLOGY 26	0	1	0	1	1
TOPOLOGY 27	0	0	1	1	1
TOPOLOGY 28	1	0	1	1	1
TOPOLOGY 29	1	1	0	1	1
TOPOLOGY 30	0	1	1	1	1
TOPOLOGY 31	0	0	0	1	1
TOPOLOGY 32	1	1	1	1	1
