# Supplementary material for: Phosphorelays Provide Tunable Signal Processing Capabilities for the Cell
Source: PLoS Comput Biol. 2013 Nov 7;9(11):e1003322. doi: 10.1371/journal.pcbi.1003322 (PMC3820541; doi:10.1371/journal.pcbi.1003322)
Supplement: Text S6 — The “biologically relevant” parameter regime for the parameters of the model and references to the experimental studies, from which this information is compiled. (XLSX) [file pcbi.1003322.s010.xlsx]

## Sheet: Sheet1
	Parameters picked from published literature
PARAMETERS	PARAMETER REGIMES		SOURCES
	Low	High
k2 (Ms)-1	10	100000	J. Tindall et al, 2010; Grimshaw et al, 1998; Groban et al, 2009
k3 (Ms)-1	10	100000	J. Tindall et al, 2010; Grimshaw et al, 1998; Groban et al, 2009
k4 (Ms)-1	10	100000	J. Tindall et al, 2012; Groban et al, 2009
k5 (Ms)-1	10	100000	Porter et al, 2008 ; J.P. Armitage et al, 2010
k6 (Ms)-1	1	10	Porter et al, 2008 ; J.P. Armitage et al, 2010
k2r (Ms-1)	10	100000	J. Tindall et al, 2010
k3r (Ms-1)	10	100000	J. Tindall et al, 2010
k4r (Ms-1)	10	100000	J. Tindall et al, 2010
k5r (Ms-1)	0.001	0.1	Porter et al, 2008 ; J.P. Armitage et al, 2010
kh1 (s-1)	0.001	0.1	J. Tindall et al, 2010; Grimshaw et al, 1998
kh2 (s-1)	0.001	0.1	J. Tindall et al, 2010; Porter et al, 2002
Hktotal (M)	1e-06	0.0002	J. Tindall et al, 2010
Rectotal (M)	1e-06	0.0002	J. Tindall et al, 2010
Hpttotal (M)	1e-06	0.0002	J. Tindall et al, 2010
Rrtotal (M)	1e-06	0.0002	J. Tindall et al, 2010
	Tindall, Marcus J., Steven L. Porter, Philip K. Maini, and Judith P. Armitage. “Modeling Chemotaxis Reveals the Role of Reversed Phosphotransfer and a Bi-Functional Kinase-Phosphatase.” Edited by Christopher V. Rao. PLoS Computational Biology 6, no. 8 (August 2010): e1000896. doi:10.1371/journal.pcbi.1000896.
	Grimshaw, C E, S Huang, C G Hanstein, M a Strauch, D Burbulys, L Wang, J a Hoch, and J M Whiteley. “Synergistic Kinetic Interactions Between Components of the Phosphorelay Controlling Sporulation in Bacillus Subtilis.” Biochemistry 37, no. 5 (February 1998): 1365–75. doi:10.1021/bi971917m.
	Groban, Eli S, Elizabeth J Clarke, Howard M Salis, Susan M Miller, and Christopher a Voigt. “Kinetic Buffering of Cross Talk Between Bacterial Two-component Sensors.” Journal of Molecular Biology 390, no. 3 (July 2009): 380–93. doi:10.1016/j.jmb.2009.05.007.
	Porter, Steven L, Mark a J Roberts, Cerys S Manning, and Judith P Armitage. “A Bifunctional Kinase-phosphatase in Bacterial Chemotaxis.” Proceedings of the National Academy of Sciences of the United States of America 105, no. 47 (November 2008): 18531–6. doi:10.1073/pnas.0808010105.
	Porter, Steven L, and Judith P Armitage. “Phosphotransfer in Rhodobacter Sphaeroides Chemotaxis.” Journal of Molecular Biology 324, no. 1 (November 2002): 35–45. doi:10.1016/S0022-2836(02)01031-8.
